# Supplementary material for: Targeting miR‐223 in neutrophils enhances the clearance of Staphylococcus aureus in infected wounds
Source: PubMed Central journal article supplement (PMC6180296; doi:10.15252/emmm.201809024), 2018-08-31
Supplement: EMMM-10-e9024-s001.pdf [file EMMM-10-e9024-s001.pdf]

## Appendix

### **Targeting *miR-223* in neutrophils enhances the clearance of *Staphylococcus aureus* in infected wounds**

Maiko de Kerckhove, Katsuya Tanaka, Takahiro Umehara, Momoko Okamoto, Sotaro Kanematsu, Hiroko Hayashi, Hiroki Yano, Soushi Nishiura, Shiho Tooyama, Yutaka Matsubayashi, Toshimitsu Komatsu, Seongjoon Park, Yuka Okada, Rina Takahashi, Yayoi Kawano, Takehisa Hanawa, Keisuke Iwasaki, Tadashige Nozaki, Hidetaka Torigoe, Kazuya Ikematsu, Yutaka Suzuki, Katsumi Tanaka, Paul Martin, Isao Shimokawa, Ryoichi Mori

#### **Table of contents**

**Appendix Figure S1.** Flowchart for the comprehensive identification of wound-induced Ago2 bound-miRNA complexes using NGS.

**Appendix Figure S2.** Expression of *miR-223* in skin wound healing.

**Appendix Figure S3.** Flowchart for the comprehensive identification of *miR-223* target mRNAs using Strand NGS and NGS data.

**Appendix Figure S4.** *miR-223*<sup>Y/-</sup> neutrophils improve *S. aureus*-infected skin wound healing.

**Appendix Table S1.** Number of annotated reads at various time points in skin wound sites.

**Appendix Table S2.** Top 9 candidate inflammation-related miRNA reads.

**Appendix Table S3.** High expression of miRNA reads at various time points in skin wound sites.

**Appendix Table S4.** The profile of each human sample.

**Appendix Table S5.** List of antibodies.

**Appendix Table S6.** List of primers.

**Appendix Table S7.** Statistical analysis.

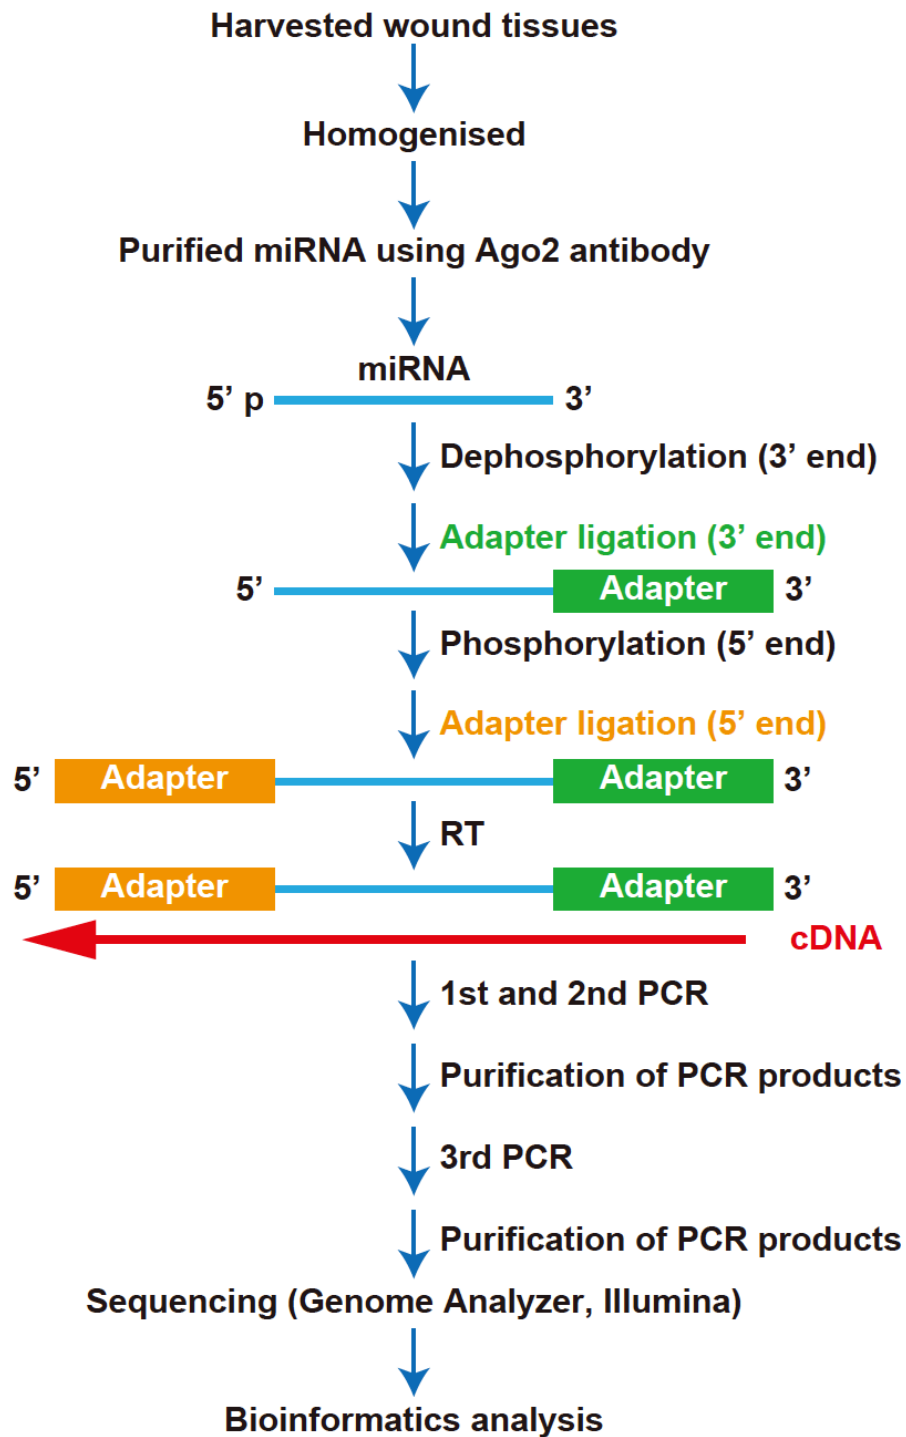

**Appendix Figure S1. Flowchart for the comprehensive identification of wound-induced Ago2 bound-miRNA complexes using NGS.**

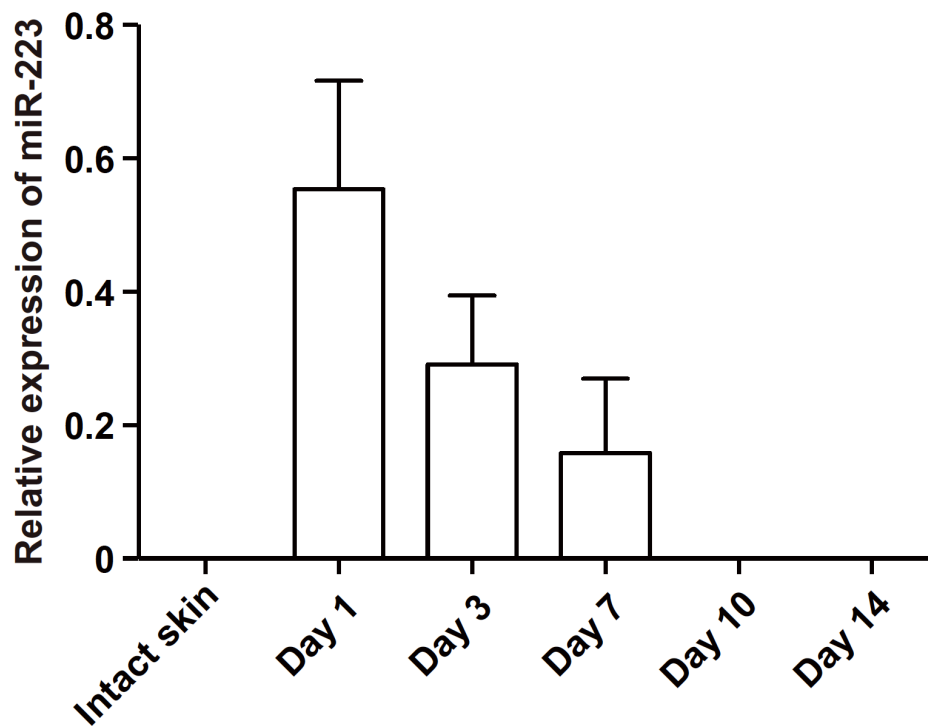

**Appendix Figure S2. Expression of *miR-223* in skin wound healing.**

Expression of *miR-223* in murine skin wound healing measured by qPCR relative to snoRNA202 (n = 4 - 6). Part of this results (intact, d 1, d 3, d7) are related to expression of *miR-223* corresponding to each time point in Figure 1. Data information: All values represent the mean ± SD.

Number of miR-223-3p target mRNAs

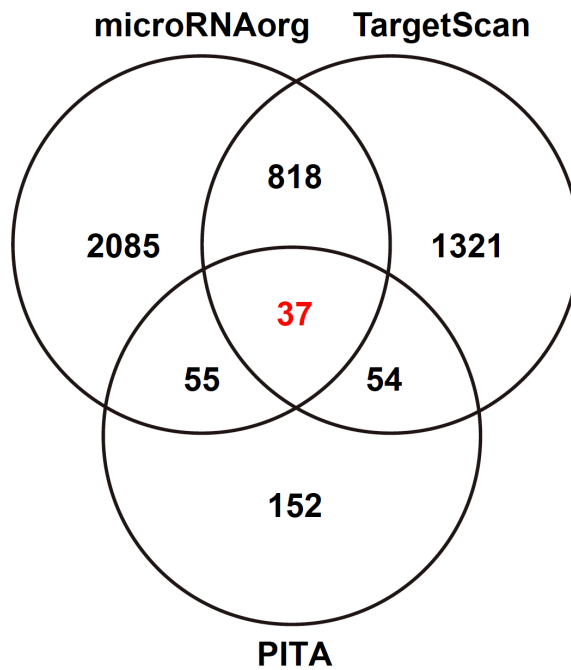

37 miR-223-3p target mRNAs

|               |                 |                |                |                |
|---------------|-----------------|----------------|----------------|----------------|
| <i>Acvr2a</i> | <i>Il6</i>      | <i>Slc39a1</i> | <i>Hapln2</i>  | <i>Aldh1l2</i> |
| <i>Alcam</i>  | <i>Nfia</i>     | <i>Actr1a</i>  | <i>Myh10</i>   | <i>Hlf</i>     |
| <i>Axin2</i>  | <i>Ppp1r14b</i> | <i>Agtpbp1</i> | <i>Klhl1</i>   | <i>Pkp4</i>    |
| <i>Cd247</i>  | <i>Rbbp6</i>    | <i>Atp2b1</i>  | <i>Slc16a6</i> | <i>Lrrc8d</i>  |
| <i>Ebf3</i>   | <i>Tgfr3</i>    | <i>Tmem178</i> | <i>Galnt7</i>  | <i>Med19</i>   |
| <i>F3</i>     | <i>Psmc6</i>    | <i>Ndnf</i>    | <i>Ube2q2</i>  |                |
| <i>Gpam</i>   | <i>Pclo</i>     | <i>Ttc4</i>    | <i>Csrnp2</i>  |                |
| <i>Has3</i>   | <i>Tnfrsf19</i> | <i>Tmed5</i>   | <i>Frmd4a</i>  |                |

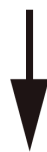

Screening of miR-223-3p target genes  
comparison 37 miRs with NGS data

Identification of miR-223-3p target mRNA 1 d wound sites

*Il6*, *Pclo*

Appendix Figure S3. Flowchart for the comprehensive identification of *miR-223* target mRNAs using Strand NGS and NGS data.

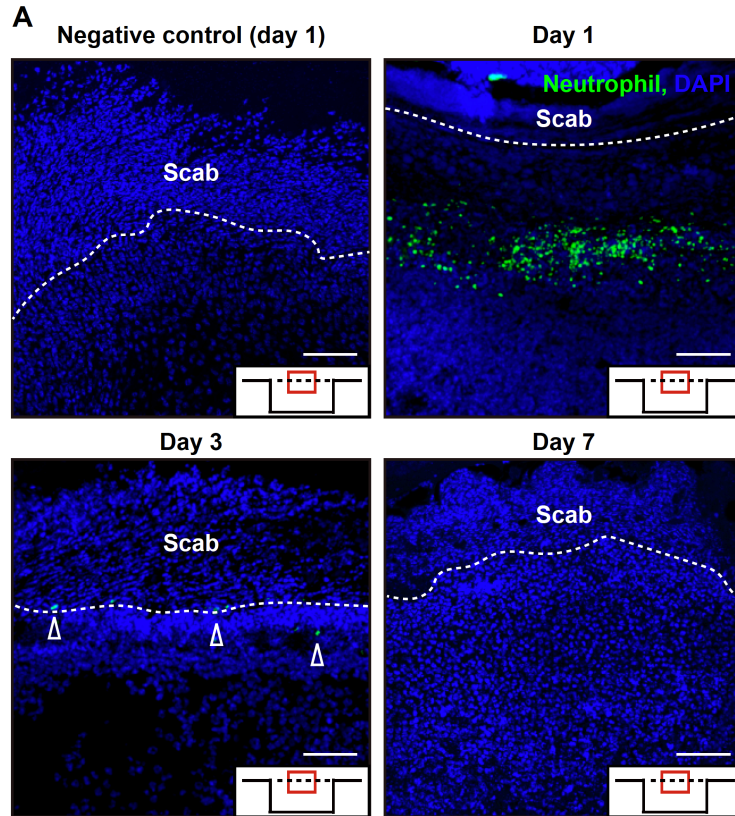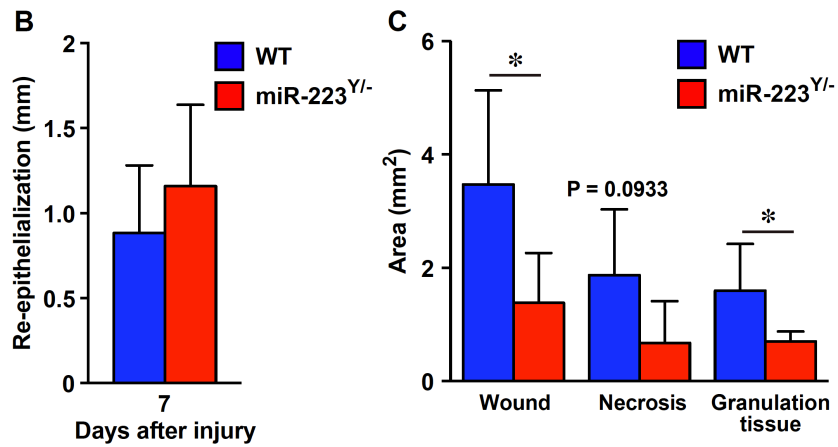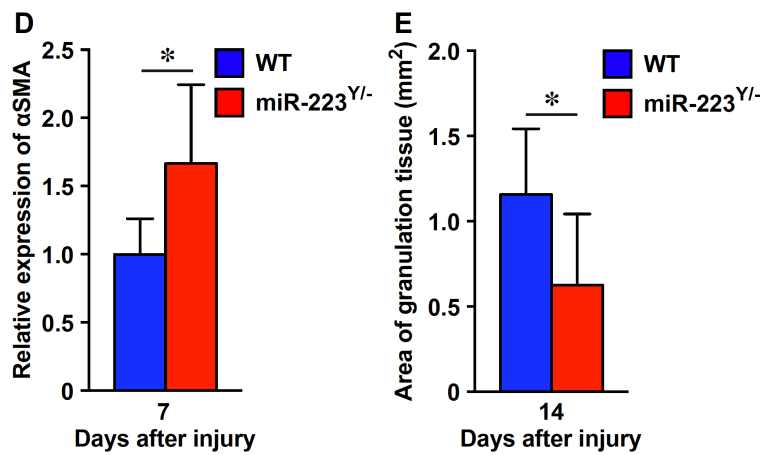

**Appendix Figure S4. *miR-223*<sup>Y/-</sup> neutrophils improve *S. aureus*-infected skin wound healing.**

**A.** Transplanted EGFP-expressing WT neutrophils in *S. aureus* skin wound sites. Representative images of EGFP-expressing WT neutrophils in *S. aureus* skin wound sites at various timepoints after EGFP-expressing neutrophil transplantation (n = 4). Scale bar, 50  $\mu$ m.

**B.** Measurement of the epithelial tongue at d 7 after injury in WT neutrophil-transplanted (WT) and *miR-223*<sup>Y/-</sup> neutrophil-transplanted (*miR-223*<sup>Y/-</sup>) wounds (n = 5).

**C.** Measurement of the total wound area, necrotic lesion area, and granulation tissue area at d 7 after injury in WT neutrophil-transplanted and *miR-223*<sup>Y/-</sup> neutrophil-transplanted wounds (n = 5).

**D.** Quantification of the expression of  $\alpha$ SMA at d 7 in WT neutrophil-transplanted and *miR-223*<sup>Y/-</sup> neutrophil-transplanted wounds (n = 6).

**E.** Measurement of the granulation tissue area at d 14 wound sites from WT neutrophil-transplanted and *miR-223*<sup>Y/-</sup> neutrophil-transplanted wounds (n = 6).

Data information: All values represent the mean  $\pm$  SD. Unpaired *t*-tests were used to generate *P*-values indicated in the Figure. \**P*<0.05.

**Appendix Table S1. Number of annotated reads at various time points in skin wound sites.**

| Category             | Intact               | Day 1                | Day 3                | Day 7                | Day 10               | Day 14               |
|----------------------|----------------------|----------------------|----------------------|----------------------|----------------------|----------------------|
| total_reads          | 2,448,759            | 2,172,903            | 1,499,496            | 2,179,215            | 2,031,016            | 2,338,879            |
| filtered_out_by_trim | 92,478               | 135,833              | 105,836              | 74,749               | 86,501               | 87,952               |
| filtered_pass        | 2,356,281            | 2,037,070            | 1,393,660            | 2,104,466            | 1,944,515            | 2,250,927            |
| genome_aligned       | 2,334,669            | 2,019,622            | 1,386,056            | 2,094,861            | 1,909,111            | 2,239,740            |
| target_miRNA         | 1,920,358<br>(82.3%) | 1,776,639<br>(88.0%) | 1,219,212<br>(88.0%) | 1,924,139<br>(91.9%) | 1,462,271<br>(76.6%) | 2,038,726<br>(91.0%) |
| other_miRNA          | 6,679<br>(0.3%)      | 5,210<br>(0.3%)      | 4,135<br>(0.3%)      | 5,187<br>(0.2%)      | 6,209<br>(0.3%)      | 5,845<br>(0.3%)      |
| piRNA                | 51,457<br>(2.2%)     | 18,437<br>(0.9%)     | 13,974<br>(1.0%)     | 10,887<br>(0.5%)     | 51,115<br>(2.7%)     | 11,480<br>(0.5%)     |
| rRNA                 | 12,620<br>(0.5%)     | 2,354<br>(0.1%)      | 2,302<br>(0.2%)      | 2,838<br>(0.1%)      | 11,169<br>(0.6%)     | 3,259<br>(0.1%)      |
| tRNA                 | 757<br>(0.03%)       | 254<br>(0.01%)       | 28<br>(0.0002%)      | 371<br>(0.02%)       | 330<br>(0.02%)       | 485<br>(0.02%)       |
| snRNA                | 3,443<br>(0.1%)      | 6,197<br>(0.3%)      | 5,628<br>(0.4%)      | 1,313<br>(0.1%)      | 5,108<br>(0.3%)      | 1,465<br>(0.1%)      |
| snoRNA               | 3,177<br>(0.1%)      | 2,245<br>(0.1%)      | 996<br>(0.1%)        | 815<br>(0.04%)       | 2,218<br>(0.1%)      | 933<br>(0.04%)       |
| scRNA                | 0                    | 0                    | 0                    | 0                    | 0                    | 0                    |
| miscRNA              | 2,120<br>(0.1%)      | 606<br>(0.03%)       | 368<br>(0.03%)       | 514<br>(0.02%)       | 1,665<br>(0.1%)      | 723<br>(0.03%)       |
| RefSeq transcripts   | 193,247<br>(8.3%)    | 84,105<br>(4.2%)     | 43,293<br>(3.1%)     | 63,332<br>(3.0%)     | 229,026<br>(12.0%)   | 79,483<br>(3.5%)     |
| Only Genome          | 140,811<br>(6.0%)    | 123,575<br>(6.1%)    | 96,120<br>(6.9%)     | 85,465<br>(4.1%)     | 140,000<br>(7.3%)    | 97,341<br>(4.3%)     |

Abbreviations: piRNA, Piwi-interacting RNA; rRNA, ribosomal RNA; tRNA, transfer RNA; snRNA, small nuclear RNA; snoRNA, small nucleolar RNA; scRNA, small cytoplasmic RNA; miscRNA, miscellaneous other RNA.

\*Values in parentheses show the percentage of similarity for each genome aligned sample.

**Appendix Table S2. Top 9 candidate inflammation-related miRNA reads at various time points in skin wound sites.**

| miRNA          | Intact | Day 1   | Day 3  | Day 7 | Day 10 | Day 14 | Day 1 / Intact |
|----------------|--------|---------|--------|-------|--------|--------|----------------|
| mmu-miR-147    | 6      | 442     | 96     | 8     | 12     | 8      | 73.67          |
| mmu-miR-223    | 3,957  | 138,618 | 29,135 | 7,251 | 2,968  | 5,883  | 35.03          |
| mmu-miR-129-3p | 19     | 582     | 64     | 47    | 47     | 54     | 30.63          |
| mmu-miR-139-5p | 575    | 7,693   | 1,331  | 1,051 | 859    | 1,114  | 13.38          |
| mmu-miR-21*    | 256    | 2,751   | 1,721  | 76    | 67     | 34     | 10.75          |
| mmu-miR-340-5p | 250    | 1,672   | 1,331  | 462   | 179    | 439    | 6.69           |
| mmu-miR-142-3p | 1,872  | 12,270  | 6,540  | 5,416 | 2,617  | 4,324  | 6.55           |
| mmu-miR-142-5p | 2,493  | 15,944  | 8,980  | 5,492 | 3,146  | 3,254  | 6.40           |
| mmu-miR-486    | 1,834  | 8,266   | 3,040  | 5,010 | 4,851  | 4,243  | 4.51           |

Abbreviation: mmu, *Mus musculus*. Note: Cutoff value > 4.5 data from Dataset EV1.



**Appendix Table S3. High expression of miRNA reads at various time points in skin wound sites.**

**Intact skin vs. day 3**

| miRNA           | Intact | Day 1  | Day 3  | Day 7  | Day 10 | Day 14 | Day 3 / Intact |
|-----------------|--------|--------|--------|--------|--------|--------|----------------|
| mmu-miR-147     | 6      | 442    | 96     | 8      | 12     | 8      | 16.00          |
| mmu-miR-223     | 3957   | 138618 | 29135  | 7251   | 2968   | 5883   | 7.36           |
| mmu-miR-21*     | 256    | 2751   | 1721   | 76     | 67     | 34     | 6.72           |
| mmu-miR-450b-5p | 2      | 13     | 12     | 33     | 8      | 20     | 6.00           |
| mmu-miR-18b     | 3      | 7      | 16     | 2      | 3      | 3      | 5.33           |
| mmu-miR-340-5p  | 250    | 1672   | 1331   | 462    | 179    | 439    | 5.32           |
| mmu-miR-21      | 46385  | 108302 | 218138 | 400610 | 195053 | 267573 | 4.70           |
| mmu-miR-363     | 7      | 57     | 32     | 38     | 14     | 27     | 4.57           |

Note: Cutoff value > 4.5 data from Dataset EV1.

**Intact skin vs. day 7**

| miRNA           | Intact | Day 1  | Day 3  | Day 7  | Day 10 | Day 14 | Day 7 / Intact |
|-----------------|--------|--------|--------|--------|--------|--------|----------------|
| mmu-miR-592     | 2      | 5      | 8      | 54     | 66     | 24     | 27.00          |
| mmu-miR-155     | 23     | 18     | 23     | 409    | 302    | 307    | 17.78          |
| mmu-miR-450b-5p | 2      | 13     | 12     | 33     | 8      | 20     | 16.50          |
| mmu-miR-335-3p  | 9      | 3      | 2      | 146    | 36     | 46     | 16.22          |
| mmu-miR-297a    | 1      | 1      | 2      | 13     | 9      | 6      | 13.00          |
| mmu-miR-214*    | 84     | 109    | 104    | 900    | 611    | 973    | 10.71          |
| mmu-miR-672     | 4      | 0      | 0      | 42     | 19     | 9      | 10.50          |
| mmu-miR-29a*    | 14     | 25     | 17     | 134    | 123    | 226    | 9.57           |
| mmu-miR-450a-5p | 210    | 207    | 179    | 1913   | 581    | 1177   | 9.11           |
| mmu-miR-1188    | 4      | 4      | 8      | 36     | 24     | 10     | 9.00           |
| mmu-miR-21      | 46385  | 108302 | 218138 | 400610 | 195053 | 267573 | 8.64           |
| mmu-miR-574-5p  | 4      | 6      | 2      | 29     | 30     | 45     | 7.25           |
| mmu-miR-455*    | 19     | 7      | 11     | 136    | 87     | 130    | 7.16           |
| mmu-miR-137     | 1      | 5      | 2      | 7      | 3      | 9      | 7.00           |

|                |      |      |     |      |      |      |      |
|----------------|------|------|-----|------|------|------|------|
| mmu-miR-294    | 1    | 1    | 2   | 7    | 1    | 8    | 7.00 |
| mmu-miR-499    | 4    | 4    | 6   | 27   | 4    | 14   | 6.75 |
| mmu-miR-27a*   | 2    | 13   | 0   | 12   | 6    | 9    | 6.00 |
| mmu-miR-875-5p | 1    | 0    | 0   | 6    | 1    | 5    | 6.00 |
| mmu-miR-126-5p | 1244 | 632  | 498 | 7372 | 6015 | 8831 | 5.93 |
| mmu-miR-136    | 1197 | 1034 | 522 | 7008 | 4893 | 7569 | 5.85 |
| mmu-miR-679    | 3    | 5    | 3   | 17   | 10   | 9    | 5.67 |
| mmu-miR-667    | 60   | 56   | 55  | 329  | 299  | 224  | 5.48 |
| mmu-miR-34b-3p | 33   | 81   | 113 | 180  | 103  | 83   | 5.45 |
| mmu-miR-363    | 7    | 57   | 32  | 38   | 14   | 27   | 5.43 |
| mmu-miR-467c   | 5    | 16   | 4   | 23   | 19   | 16   | 4.60 |
| mmu-miR-467d   | 5    | 0    | 2   | 23   | 19   | 20   | 4.60 |

Note: Cutoff value > 4.5 data from Dataset EV1.

### Intact skin vs. day 10

| miRNA           | Intact | Day 1 | Day 3 | Day 7 | Day 10 | Day 14 | Day 10 / Intact |
|-----------------|--------|-------|-------|-------|--------|--------|-----------------|
| mmu-miR-592     | 2      | 5     | 8     | 54    | 66     | 24     | 33.00           |
| mmu-miR-155     | 23     | 18    | 23    | 409   | 302    | 307    | 13.13           |
| mmu-miR-297a    | 1      | 1     | 2     | 13    | 9      | 6      | 9.00            |
| mmu-miR-29a*    | 14     | 25    | 17    | 134   | 123    | 226    | 8.79            |
| mmu-miR-574-5p  | 4      | 6     | 2     | 29    | 30     | 45     | 7.50            |
| mmu-miR-214*    | 84     | 109   | 104   | 900   | 611    | 973    | 7.27            |
| mmu-miR-1934    | 1      | 10    | 1     | 4     | 7      | 5      | 7.00            |
| mmu-miR-206     | 3585   | 8831  | 5407  | 15022 | 23863  | 14210  | 6.66            |
| mmu-miR-1188    | 4      | 4     | 8     | 36    | 24     | 10     | 6.00            |
| mmu-miR-466f-3p | 2      | 22    | 3     | 4     | 12     | 5      | 6.00            |
| mmu-miR-384-5p  | 1      | 0     | 0     | 3     | 5      | 2      | 5.00            |
| mmu-miR-701     | 2      | 0     | 5     | 7     | 10     | 7      | 5.00            |
| mmu-miR-667     | 60     | 56    | 55    | 329   | 299    | 224    | 4.98            |

|                |      |     |     |      |      |      |      |
|----------------|------|-----|-----|------|------|------|------|
| mmu-miR-126-5p | 1244 | 632 | 498 | 7372 | 6015 | 8831 | 4.84 |
| mmu-miR-672    | 4    | 0   | 0   | 42   | 19   | 9    | 4.75 |
| mmu-miR-455*   | 19   | 7   | 11  | 136  | 87   | 130  | 4.58 |
| mmu-miR-297c   | 2    | 8   | 1   | 4    | 9    | 9    | 4.50 |

Note: Cutoff value > 4.5 data from Dataset EV1.

### Intact skin vs. day 14

| miRNA           | Intact | Day 1  | Day 3  | Day 7  | Day 10 | Day 14 | Day 14 / Intact |
|-----------------|--------|--------|--------|--------|--------|--------|-----------------|
| mmu-miR-29a*    | 14     | 25     | 17     | 134    | 123    | 226    | 16.14           |
| mmu-miR-155     | 23     | 18     | 23     | 409    | 302    | 307    | 13.35           |
| mmu-miR-592     | 2      | 5      | 8      | 54     | 66     | 24     | 12.00           |
| mmu-miR-214*    | 84     | 109    | 104    | 900    | 611    | 973    | 11.58           |
| mmu-miR-574-5p  | 4      | 6      | 2      | 29     | 30     | 45     | 11.25           |
| mmu-miR-450b-5p | 2      | 13     | 12     | 33     | 8      | 20     | 10.00           |
| mmu-miR-137     | 1      | 5      | 2      | 7      | 3      | 9      | 9.00            |
| mmu-miR-294     | 1      | 1      | 2      | 7      | 1      | 8      | 8.00            |
| mmu-miR-126-5p  | 1244   | 632    | 498    | 7372   | 6015   | 8831   | 7.10            |
| mmu-miR-190b    | 1      | 1      | 0      | 1      | 3      | 7      | 7.00            |
| mmu-miR-455*    | 19     | 7      | 11     | 136    | 87     | 130    | 6.84            |
| mmu-miR-136     | 1197   | 1034   | 522    | 7008   | 4893   | 7569   | 6.32            |
| mmu-miR-297a    | 1      | 1      | 2      | 13     | 9      | 6      | 6.00            |
| mmu-miR-21      | 46385  | 108302 | 218138 | 400610 | 195053 | 267573 | 5.77            |
| mmu-miR-450a-5p | 210    | 207    | 179    | 1913   | 581    | 1177   | 5.60            |
| mmu-miR-9       | 12     | 12     | 10     | 44     | 24     | 65     | 5.42            |
| mmu-miR-124     | 9      | 19     | 13     | 23     | 39     | 46     | 5.11            |
| mmu-miR-335-3p  | 9      | 3      | 2      | 146    | 36     | 46     | 5.11            |
| mmu-miR-146a    | 1394   | 2833   | 3633   | 5372   | 4318   | 7019   | 5.04            |
| mmu-miR-1934    | 1      | 10     | 1      | 4      | 7      | 5      | 5.00            |
| mmu-miR-875-5p  | 1      | 0      | 0      | 6      | 1      | 5      | 5.00            |

|              |   |    |   |    |   |   |      |
|--------------|---|----|---|----|---|---|------|
| mmu-miR-27a* | 2 | 13 | 0 | 12 | 6 | 9 | 4.50 |
| mmu-miR-297c | 2 | 8  | 1 | 4  | 9 | 9 | 4.50 |

Note: Cutoff value > 4.5 data from Dataset EV1.

**Appendix Table S4. The profile of each human sample.**

| Sex | Age (years) | Etiology                                                                                  | Biopsy site |
|-----|-------------|-------------------------------------------------------------------------------------------|-------------|
| M   | 67          | Epidermal cyst                                                                            | Face        |
| M   | 75          | Cellulitis with microabscess                                                              | Face        |
| M   | 60          | Inflammatory granulation tissue with microabscess                                         | Abdominal   |
| F   | 32          | Cystic lesion with inflammatory granulation tissue and fibrosis                           | Inguinal    |
| F   | 79          | Abscess                                                                                   | Face        |
| F   | 71          | Epidermal cyst                                                                            | Neck        |
| M   | 28          | Epidermal cyst with microabscess and inflammatory granulation tissue                      | Face        |
| M   | 82          | Necrotizing lesion with neutrophil and eosinophil infiltration                            | Head        |
| F   | 56          | Epidermal cyst with multiple abscess and chronic inflammation and psoriasiform dermatitis | Hip         |
| F   | 12          | Abscess forming granulomatous inflammation                                                | Eyelid      |
| F   | 23          | Cystic lesion with inflammatory granulation tissue, foreign body reaction, and granuloma  | Arm         |
| F   | 33          | Pustular dermatitis with erosion, ulcer, and gram positive cocci                          | Arm         |
| F   | 47          | Dermal neutrophilic infiltration                                                          | Thing       |
| F   | 75          | Abscess                                                                                   | Leg         |
| M   | 62          | Cutaneous ulcer                                                                           | Foot        |

Abbreviations: M, Male; F, Female

**Appendix Table S5. List of antibodies.**

| <b>Primary antibody</b>         | <b>Company</b>                | <b>Catalog No.</b> | <b>Species</b> | <b>Dilution</b> |
|---------------------------------|-------------------------------|--------------------|----------------|-----------------|
| $\alpha$ smooth muscle actin    | Abcam                         | ab5694             | Rabbit         | 1:500           |
| F4/80                           | Abcam                         | ab6640             | Rat            | 1:400           |
| IL6                             | Abcam                         | ab6672             | Rabbit         | 1:400           |
| Neutrophil<br>(Ly-6G and Ly-6C) | Abcam                         | ab2557             | Rat            | 1:400           |
| Alexa Fluor 568                 | ThermoFisher                  | A-11011            | Goat           | 1:1000          |
| DIG                             | Roche Diagnostics             | 11093274910        | Sheep          | 1:800           |
| Ago2                            | Wako Pure Chemical Industries | 292-67301          | Mouse          | 5 $\mu$ g/IP    |
| C/EBP $\alpha$                  | GeneTex                       | GTX100674          | Rabbit         | 5 $\mu$ g/IP    |
| Histone H3                      | Cell Signaling Technology     | 4620               | Rabbit         | 5 $\mu$ g/IP    |
| Normal rabbit IgG               | Cell Signaling Technology     | 2729               | Rabbit         | 5 $\mu$ g/IP    |

Abbreviation: IP, immunoprecipitation.

**Appendix Table S6. List of primers.**

| Gene symbol           | Sequences (5'-3')                                                      |
|-----------------------|------------------------------------------------------------------------|
| Rps18                 | (F) 5'-TTCTGGCCAACGGTCTAGACAAC-3'<br>(R) 5'-CCAGTGGTCTTGGTGTGCTGA-3'   |
| Il6 (M)               | (F) 5'-CAACGATGATGCACTTGCAGA-3'<br>(R) 5'-CTCCAGGTAGCTATGGTACTCCAGA-3' |
| Il6ra                 | (F) 5'- CCTGAGACTCAAGCAGAAATGG-3'<br>(R) 5'-AGAAGGAAGGTCGGCTTCAGT-3'   |
| Il6st                 | (F) 5'- CCGTGTGGTTACATCTACCCT-3'<br>(R) 5'-CGTGGTTCTGTTGATGACAGTG-3'   |
| Il1b                  | (F) 5'-TCCAGGATGAGGACATGAGCAC-3'<br>(R) 5'-GAACGTCACACACCAGCAGGTTA-3'  |
| B2M                   | (F) 5'-CGGGCATTCTGAAGCTGA-3'<br>(R) 5'-GGATGGATGAAACCCAGACACATAG-3'    |
| IL6 (H)               | (F) 5'-AAGCCAGAGCTGTGCAGATGAGTA-3'<br>(R) 5'-TGTCTGCAGCCACTGGTTC-3'    |
| CEBPA                 | (F) 5'-TCGTGGGTCAGCTCTGAGGA-3'<br>(R) 5'-GCAATGCTGAAGGCATACAGTACAA-3'  |
| RUNX1                 | (F) 5'-CACTGGCGCTGCAACAAGA-3'<br>(R) 5'-CCAGCCATCACAGTGACCAGA-3'       |
| SPI1                  | (F) 5'-GCCCTATGACACGGATCTATACCAA-3'<br>(R) 5'-TCTCGGCGAAGCTCTCGAA-3'   |
| ChIP-PCR<br>ChIP-qPCR | (F) 5'-GCCCTCTTTGTTGATGTGTC-3'<br>(R) 5'-GGCAGCTATTAAAGTGCCCT-3'       |

Abbreviations: F; forward, R; reverse, M; *Mus musculus*, H; *Homo sapiens*.

**Appendix Table S7. Statistical analysis.**

**Fig 1. *miR-147***

| <b>Group compared</b> | <b>Summary</b> | <b>P value</b> | <b>Statistical test</b>           |
|-----------------------|----------------|----------------|-----------------------------------|
| Intact vs. d 1        | ****           | < 0.0001       | Tukey's multiple comparisons test |
| Intact vs. d 3        | ***            | 0.0005         | Tukey's multiple comparisons test |
| d 1 vs. d 7           | ****           | < 0.0001       | Tukey's multiple comparisons test |
| d 3 vs. d 7           | ***            | 0.0005         | Tukey's multiple comparisons test |

**Fig 1. *miR-223***

| <b>Group compared</b> | <b>Summary</b> | <b>P value</b> | <b>Statistical test</b>           |
|-----------------------|----------------|----------------|-----------------------------------|
| Intact vs. d 1        | ****           | < 0.0001       | Tukey's multiple comparisons test |
| Intact vs. d 3        | **             | 0.0011         | Tukey's multiple comparisons test |
| d 1 vs. d 3           | **             | 0.0029         | Tukey's multiple comparisons test |
| d 1 vs. d 7           | ****           | < 0.0001       | Tukey's multiple comparisons test |

**Fig 1. *miR-129-3p***

| <b>Group compared</b> | <b>Summary</b> | <b>P value</b> | <b>Statistical test</b>           |
|-----------------------|----------------|----------------|-----------------------------------|
| Intact vs. d 1        | *              | 0.0461         | Tukey's multiple comparisons test |
| Intact vs. d 3        | ****           | < 0.0001       | Tukey's multiple comparisons test |
| d 1 vs. d 3           | ***            | 0.0001         | Tukey's multiple comparisons test |
| d 3 vs. d 7           | ****           | < 0.0001       | Tukey's multiple comparisons test |



**Fig 1. miR-139-5p**

| <b>Group compared</b> | <b>Summary</b> | <b>P value</b> | <b>Statistical test</b>           |
|-----------------------|----------------|----------------|-----------------------------------|
| Intact vs. d 1        | ****           | < 0.0001       | Tukey's multiple comparisons test |
| Intact vs. d 3        | ***            | 0.0005         | Tukey's multiple comparisons test |
| Intact vs. d 7        | *              | 0.0252         | Tukey's multiple comparisons test |
| d 1 vs. d 3           | ***            | 0.0009         | Tukey's multiple comparisons test |
| d 1 vs. d 7           | ****           | < 0.0001       | Tukey's multiple comparisons test |

**Fig 1. miR-21\***

| <b>Group compared</b> | <b>Summary</b> | <b>P value</b> | <b>Statistical test</b>           |
|-----------------------|----------------|----------------|-----------------------------------|
| Intact vs. d 1        | **             | 0.0056         | Tukey's multiple comparisons test |
| d 1 vs. d 3           | *              | 0.0440         | Tukey's multiple comparisons test |
| d 1 vs. d 7           | *              | 0.0470         | Tukey's multiple comparisons test |

**Fig 1. miR-340-5p**

| <b>Group compared</b> | <b>Summary</b> | <b>P value</b> | <b>Statistical test</b>           |
|-----------------------|----------------|----------------|-----------------------------------|
| Intact vs. d 1        | **             | 0.0070         | Tukey's multiple comparisons test |
| Intact vs. d 3        | ****           | 0.0005         | Tukey's multiple comparisons test |
| d 1 vs. d 3           | ***            | 0.0001         | Tukey's multiple comparisons test |
| d 3 vs. d 7           | ****           | < 0.0001       | Tukey's multiple comparisons test |

**Fig 1. *miR-142-3p***

| <b>Group compared</b> | <b>Summary</b> | <b>P value</b> | <b>Statistical test</b>           |
|-----------------------|----------------|----------------|-----------------------------------|
| Intact vs. d 1        | *              | 0.0486         | Tukey's multiple comparisons test |
| Intact vs. d 3        | **             | 0.0027         | Tukey's multiple comparisons test |
| d 3 vs. d 7           | **             | 0.0080         | Tukey's multiple comparisons test |

**Fig 1. *miR-142-5p***

| <b>Group compared</b> | <b>Summary</b> | <b>P value</b> | <b>Statistical test</b>           |
|-----------------------|----------------|----------------|-----------------------------------|
| Intact vs. d 1        | ****           | < 0.0001       | Tukey's multiple comparisons test |
| Intact vs. d 3        | ****           | < 0.0001       | Tukey's multiple comparisons test |
| d 1 vs. d 7           | ****           | < 0.0001       | Tukey's multiple comparisons test |
| d 3 vs. d 7           | ****           | < 0.0001       | Tukey's multiple comparisons test |

**Fig 2A. Expression of *miR-223***

| <b>Group compared</b> | <b>Summary</b> | <b>P value</b> | <b>Statistical test</b>          |
|-----------------------|----------------|----------------|----------------------------------|
| Intact vs. 12 hrs     | ****           | < 0.0001       | Tukey's multiple comparison test |
| 0.5hr vs. 12 hrs      | ****           | < 0.0001       | Tukey's multiple comparison test |
| 3 hrs vs. 12 hrs      | **             | 0.0062         | Tukey's multiple comparison test |
| 12 hrs vs. 24 hrs     | ***            | 0.0003         | Tukey's multiple comparison test |

**Fig 2A. Expression of *miR-142-3p***

| <b>Group compared</b> | <b>Summary</b> | <b>P value</b> | <b>Statistical test</b>          |
|-----------------------|----------------|----------------|----------------------------------|
| Intact vs. 12 hrs     | **             | 0.0032         | Tukey's multiple comparison test |
| 0.5hr vs. 3 hrs       | *              | 0.0500         | Tukey's multiple comparison test |
| 0.5hr vs. 12 hrs      | **             | 0.0032         | Tukey's multiple comparison test |

**Fig 2B. Expression of *miR-223***

| <b>Group compared</b>                                     | <b>Summary</b> | <b>P value</b> | <b>Statistical test</b>          |
|-----------------------------------------------------------|----------------|----------------|----------------------------------|
| WT vs. <i>PU.1</i> <sup>+/-</sup>                         | ****           | < 0.0001       | Tukey's multiple comparison test |
| WT vs. <i>PU.1</i> <sup>-/-</sup>                         | ****           | < 0.0001       | Tukey's multiple comparison test |
| <i>PU.1</i> <sup>+/-</sup> vs. <i>PU.1</i> <sup>-/-</sup> | ***            | 0.0004         | Tukey's multiple comparison test |

**Fig 2B. Expression of *miR-142-3p***

| <b>Group compared</b>                                     | <b>Summary</b> | <b>P value</b> | <b>Statistical test</b>          |
|-----------------------------------------------------------|----------------|----------------|----------------------------------|
| WT vs. <i>PU.1</i> <sup>+/-</sup>                         | ****           | < 0.0001       | Tukey's multiple comparison test |
| WT vs. <i>PU.1</i> <sup>-/-</sup>                         | ****           | < 0.0001       | Tukey's multiple comparison test |
| <i>PU.1</i> <sup>+/-</sup> vs. <i>PU.1</i> <sup>-/-</sup> | ***            | 0.0004         | Tukey's multiple comparison test |

**Fig 2B. Expression of *miR-142-5p***

| <b>Group compared</b>                                     | <b>Summary</b> | <b>P value</b> | <b>Statistical test</b>          |
|-----------------------------------------------------------|----------------|----------------|----------------------------------|
| WT vs. <i>PU.1</i> <sup>+/-</sup>                         | ****           | < 0.0001       | Tukey's multiple comparison test |
| WT vs. <i>PU.1</i> <sup>-/-</sup>                         | ****           | < 0.0001       | Tukey's multiple comparison test |
| <i>PU.1</i> <sup>+/-</sup> vs. <i>PU.1</i> <sup>-/-</sup> | **             | 0.0024         | Tukey's multiple comparison test |

**Fig 2B. Expression of *miR-139-5p***

| Group compared                                            | Summary | P value | Statistical test                 |
|-----------------------------------------------------------|---------|---------|----------------------------------|
| WT vs. <i>PU.1</i> <sup>-/-</sup>                         | **      | 0.0064  | Tukey's multiple comparison test |
| <i>PU.1</i> <sup>+/-</sup> vs. <i>PU.1</i> <sup>-/-</sup> | **      | 0.0028  | Tukey's multiple comparison test |

**Fig 3F. WT vs. *miR-223*<sup>Y/-</sup>**

| Group compared | Summary | P value | Statistical test                  |
|----------------|---------|---------|-----------------------------------|
| 3 d            | ***     | 0.0003  | Sidak's multiple comparisons test |
| 7 d            | *       | 0.0376  | Sidak's multiple comparisons test |

**Fig 3H. WT vs. *miR-223*<sup>Y/-</sup>**

| Group compared | Summary | P value | Statistical test                   |
|----------------|---------|---------|------------------------------------|
| 3 d            | *       | 0.0115  | Unpaired Student's <i>t</i> -tests |

**Fig 3J. WT vs. *miR-223*<sup>Y/-</sup>**

| Group compared | Summary | P value | Statistical test                   |
|----------------|---------|---------|------------------------------------|
| 7 d            | *       | 0.0206  | Unpaired Student's <i>t</i> -tests |
| 14 d           | *       | 0.0246  | Unpaired Student's <i>t</i> -tests |

**Fig 4B. WT vs. *miR-223*<sup>Y/-</sup>**

| Group compared | Summary | P value | Statistical test                   |
|----------------|---------|---------|------------------------------------|
| 3 h            | *       | 0.0445  | Unpaired Student's <i>t</i> -tests |
| 3 d            | *       | 0.0445  | Sidak's multiple comparisons test  |

**Fig 4D. WT vs. *miR-223*<sup>Y/-</sup>**

| Group compared | Summary | P value | Statistical test                   |
|----------------|---------|---------|------------------------------------|
| 1 d            | *       | 0.0322  | Unpaired Student's <i>t</i> -tests |
| 3 d            | *       | 0.0025  | Unpaired Student's <i>t</i> -tests |

**Fig 4E. WT vs. *miR-223*<sup>Y/-</sup>**

| Group compared | Summary | P value | Statistical test                   |
|----------------|---------|---------|------------------------------------|
| 1 d            | *       | 0.0285  | Unpaired Student's <i>t</i> -tests |
| 3 d            | *       | 0.0101  | Unpaired Student's <i>t</i> -tests |

**Fig 4G. WT vs. *miR-223*<sup>Y/-</sup>**

| Group compared | Summary | P value | Statistical test  |
|----------------|---------|---------|-------------------|
| 17 min         | *       | 0.0356  | Mann Whitney test |
| 45 min         | *       | 0.0356  | Mann Whitney test |
| 46 min         | *       | 0.0415  | Mann Whitney test |
| 47 min         | *       | 0.0259  | Mann Whitney test |
| 48 min         | *       | 0.0167  | Mann Whitney test |
| 49 min         | *       | 0.0156  | Mann Whitney test |
| 50 min         | *       | 0.0151  | Mann Whitney test |
| 51 min         | *       | 0.0173  | Mann Whitney test |
| 52 min         | *       | 0.0146  | Mann Whitney test |
| 53 min         | *       | 0.0162  | Mann Whitney test |
| 54 min         | *       | 0.0141  | Mann Whitney test |

|        |   |        |                   |
|--------|---|--------|-------------------|
| 55 min | * | 0.0173 | Mann Whitney test |
| 56 min | * | 0.0146 | Mann Whitney test |
| 57 min | * | 0.0156 | Mann Whitney test |
| 58 min | * | 0.0131 | Mann Whitney test |
| 59 min | * | 0.0151 | Mann Whitney test |
| 60 min | * | 0.0113 | Mann Whitney test |

**Fig 5B. WT vs. *miR-223*<sup>Y/-</sup>**

| Group compared | Summary | P value | Statistical test                   |
|----------------|---------|---------|------------------------------------|
| <i>Il6</i>     | *       | 0.0245  | Unpaired Student's <i>t</i> -tests |

**Fig 5H. *miR-223* mimic vs. each sample**

| Group compared | Summary | P value | Statistical test                    |
|----------------|---------|---------|-------------------------------------|
| vs. control    | **      | 0.0093  | Dunnett's multiple comparisons test |
| vs. mutation 2 | *       | 0.0316  | Dunnett's multiple comparisons test |
| vs. mutation 3 | **      | 0.0064  | Dunnett's multiple comparisons test |

**Fig 6B. WT vs. *miR-223*<sup>Y/-</sup>**

| Group compared | Summary | P value | Statistical test                  |
|----------------|---------|---------|-----------------------------------|
| 3 d            | *       | 0.0467  | Sidak's multiple comparisons test |
| 7 d            | **      | 0.0011  | Sidak's multiple comparisons test |

**Fig 6C. WT vs. *miR-223*<sup>Y/-</sup>**

| Group compared | Summary | P value | Statistical test                   |
|----------------|---------|---------|------------------------------------|
| 3d             | *       | 0.0403  | Unpaired Student's <i>t</i> -tests |

**Fig 6E. WT vs. *miR-223*<sup>Y/-</sup>**

| Group compared | Summary | P value | Statistical test                        |
|----------------|---------|---------|-----------------------------------------|
| 1d             | *       | 0.0403  | Unpaired t test with Welch's correction |

**Fig 6F. WT vs. *miR-223*<sup>Y/-</sup>**

| Group compared | Summary | P value | Statistical test                        |
|----------------|---------|---------|-----------------------------------------|
| <i>Il6</i>     | *       | 0.0394  | Unpaired test                           |
| <i>Il6ra</i>   | **      | 0.0013  | Unpaired Student's <i>t</i> -tests      |
| <i>Il1β</i>    | *       | 0.0371  | Unpaired t test with Welch's correction |

**Fig 6H. 3d**

| Group compared                  | Summary | P value | Statistical test                  |
|---------------------------------|---------|---------|-----------------------------------|
| WT control vs. WT-neutrophil    | -       | 0.4992  | Tukey's multiple comparisons test |
| WT control vs. KO-neutrophil    | *       | 0.0124  | Tukey's multiple comparisons test |
| WT neutrophil vs. KO-neutrophil | -       | 0.1961  | Tukey's multiple comparisons test |

**Fig 6H. 7d**

| Group compared                  | Summary | P value | Statistical test                  |
|---------------------------------|---------|---------|-----------------------------------|
| WT control vs. WT-neutrophil    | -       | 0.7993  | Tukey's multiple comparisons test |
| WT control vs. KO-neutrophil    | **      | 0.0023  | Tukey's multiple comparisons test |
| WT neutrophil vs. KO-neutrophil | ***     | 0.0002  | Tukey's multiple comparisons test |

**Fig 7B.**

| Group compared                        | Summary | P value  | Statistical test                   |
|---------------------------------------|---------|----------|------------------------------------|
| Control ODN vs. <i>miR-223</i> AS ODN | ****    | < 0.0001 | Unpaired Student's <i>t</i> -tests |

**Fig 7D. Control ODN vs. *miR-223* AS ODN**

| Group compared | Summary | P value  | Statistical test                        |
|----------------|---------|----------|-----------------------------------------|
| 6 h            | **      | 0.0083   | Unpaired t test with Welch's correction |
| 1 d            | ****    | < 0.0001 | Unpaired Student's <i>t</i> -tests      |

**Fig 7E.**

| Group compared                        | Summary | P value | Statistical test                   |
|---------------------------------------|---------|---------|------------------------------------|
| Control ODN vs. <i>miR-223</i> AS ODN | *       | 0.0307  | Unpaired Student's <i>t</i> -tests |

**Fig 7G. Control ODN vs. *miR-223* AS ODN**

| Group compared | Summary | P value | Statistical test                  |
|----------------|---------|---------|-----------------------------------|
| 3 d            | ***     | 0.0002  | Sidak's multiple comparisons test |
| 7 d            | **      | 0.0064  | Sidak's multiple comparisons test |

**Fig 7H. Control ODN vs. *miR-223* AS ODN**

| Group compared | Summary | P value | Statistical test                        |
|----------------|---------|---------|-----------------------------------------|
| Wound          | *       | 0.0217  | Unpaired t test with Welch's correction |
| Necrosis       | *       | 0.0309  | Unpaired t test with Welch's correction |

**Fig 7I.**

| Group compared                        | Summary | P value | Statistical test                   |
|---------------------------------------|---------|---------|------------------------------------|
| Control ODN vs. <i>miR-223</i> AS ODN | **      | 0.0010  | Unpaired Student's <i>t</i> -tests |

**Fig 7J.**

| Group compared                        | Summary | P value | Statistical test                   |
|---------------------------------------|---------|---------|------------------------------------|
| Control ODN vs. <i>miR-223</i> AS ODN | ***     | 0.0005  | Unpaired Student's <i>t</i> -tests |



**Fig 8A. Expression of *miR-223* in HL-60 cells**

| Group compared  | Summary | P value  | Statistical test                       |
|-----------------|---------|----------|----------------------------------------|
| Control vs. 2 d | *       | 0.0499   | Holm-Sidak's multiple comparisons test |
| Control vs. 3 d | *       | 0.0137   | Holm-Sidak's multiple comparisons test |
| Control vs. 4 d | ****    | < 0.0001 | Holm-Sidak's multiple comparisons test |
| Control vs. 5 d | ****    | < 0.0001 | Holm-Sidak's multiple comparisons test |

**Fig 8B. *miR-223* AS ODN *miR-223* expression in dHL60**

| Group compared                        | Summary | P value | Statistical test                        |
|---------------------------------------|---------|---------|-----------------------------------------|
| Control vs. <i>miR-223</i> AS ODN     | *       | 0.0385  | Unpaired t test with Welch's correction |
| Control ODN vs. <i>miR-223</i> AS ODN | *       | 0.0384  | Unpaired t test with Welch's correction |

**Fig 8C. Non PGN vs. PGN**

| Group compared        | Summary | P value | Statistical test                   |
|-----------------------|---------|---------|------------------------------------|
| Control               | *       | 0.0176  | Unpaired Student's <i>t</i> -tests |
| <i>miR-223</i> AS ODN | **      | 0.0056  | Unpaired Student's <i>t</i> -tests |

**Fig 8D. Control ODN vs. *miR-223* AS ODN**

| Group compared | Summary | P value | Statistical test                   |
|----------------|---------|---------|------------------------------------|
| Non PGN        | **      | 0.0056  | Unpaired Student's <i>t</i> -tests |
| PGN            | **      | 0.0096  | Unpaired Student's <i>t</i> -tests |

**Fig 8E. Control ODN vs. *miR-223* AS ODN**

| Group compared | Summary | P value | Statistical test                   |
|----------------|---------|---------|------------------------------------|
| Non PGN        | **      | 0.0089  | Unpaired Student's <i>t</i> -tests |
| 6 hrs          | *       | 0.0120  | Unpaired Student's <i>t</i> -tests |
| 12 hrs         | *       | 0.0116  | Unpaired Student's <i>t</i> -tests |

**Fig 8G. Relative binding activity**

| Group compared  | Summary | P value | Statistical test                   |
|-----------------|---------|---------|------------------------------------|
| Control vs. PGN | *       | 0.0361  | Unpaired Student's <i>t</i> -tests |

**Fig EV1C. WT vs. *miR-223*<sup>Y/-</sup>**

| Group compared | Summary | P value | Statistical test       |
|----------------|---------|---------|------------------------|
| d 7            | *       | 0.0206  | Unpaired <i>t</i> test |
| d 14           | *       | 0.0246  | Unpaired <i>t</i> test |

**Fig EV1E.**

| Group compared                       | Summary | P value | Statistical test       |
|--------------------------------------|---------|---------|------------------------|
| WT vs. <i>miR-223</i> <sup>Y/-</sup> | **      | 0.0013  | Unpaired <i>t</i> test |

**Fig EV2B. WT vs. *miR-223*<sup>Y/-</sup>**

| Group compared | Summary | P value | Statistical test       |
|----------------|---------|---------|------------------------|
| d 3            | **      | 0.0044  | Unpaired <i>t</i> test |
| d 7            | *       | 0.0154  | Unpaired <i>t</i> test |

**Fig EV2C.**

| Group compared                       | Summary | P value | Statistical test |
|--------------------------------------|---------|---------|------------------|
| WT vs. <i>miR-223</i> <sup>Y/-</sup> | *       | 0.0478  | Unpaired t test  |

**Fig EV3C. WT vs. *miR-223*<sup>Y/-</sup>**

| Group compared | Summary | P value | Statistical test |
|----------------|---------|---------|------------------|
| d 3            | *       | 0.0206  | Unpaired t test  |
| d 7            | *       | 0.0367  | Unpaired t test  |

**Fig EV3D. WT vs. *miR-223*<sup>Y/-</sup>**

| Group compared | Summary | P value | Statistical test |
|----------------|---------|---------|------------------|
| Wound          | *       | 0.0467  | Unpaired t test  |
| Necrosis       | *       | 0.0434  | Unpaired t test  |

**Fig EV3F.**

| Group compared                       | Summary | P value | Statistical test |
|--------------------------------------|---------|---------|------------------|
| WT vs. <i>miR-223</i> <sup>Y/-</sup> | *       | 0.0470  | Unpaired t test  |

**Fig EV4A. Control ODN vs. *miR-223* AS ODN**

| Group compared | Summary | P value | Statistical test                  |
|----------------|---------|---------|-----------------------------------|
| d 7            | ***     | 0.0004  | Sidak's multiple comparisons test |

**Fig EV4B. Pluronic gel vs. PB gel**

| Group compared | Summary | P value | Statistical test                  |
|----------------|---------|---------|-----------------------------------|
| d 3            | **      | 0.0012  | Sidak's multiple comparisons test |

**Fig EV5A. Non PGN vs. PGN**

| <b>Group compared</b> | <b>Summary</b> | <b>P value</b> | <b>Statistical test</b> |
|-----------------------|----------------|----------------|-------------------------|
| <i>CEBPA</i>          | **             | 0.0089         | Unpaired t test         |

**Appendix Fig S4C. WT neutrophil vs. *miR-223*<sup>Y/-</sup> neutrophil**

| <b>Group compared</b> | <b>Summary</b> | <b>P value</b> | <b>Statistical test</b> |
|-----------------------|----------------|----------------|-------------------------|
| Wound                 | *              | 0.0467         | Unpaired t test         |
| Necrosis              | -              | 0.0933         | Unpaired t test         |
| Granulation tissue    | *              | 0.0441         | Unpaired t test         |

**Appendix Fig S4D.**

| <b>Group compared</b>                                      | <b>Summary</b> | <b>P value</b> | <b>Statistical test</b> |
|------------------------------------------------------------|----------------|----------------|-------------------------|
| WT neutrophil vs. <i>miR-223</i> <sup>Y/-</sup> neutrophil | *              | 0.0282         | Unpaired t test         |

**Appendix Fig S4E.**

| <b>Group compared</b>                                      | <b>Summary</b> | <b>P value</b> | <b>Statistical test</b> |
|------------------------------------------------------------|----------------|----------------|-------------------------|
| WT neutrophil vs. <i>miR-223</i> <sup>Y/-</sup> neutrophil | *              | 0.0446         | Unpaired t test         |
