# Supplementary material for: Targeting miR‐223 in neutrophils enhances the clearance of Staphylococcus aureus in infected wounds
Source: PubMed Central journal article supplement (PMC6180296; doi:10.15252/emmm.201809024), 2018-08-31
Supplement: EMMM-10-e9024-s002.pdf [file EMMM-10-e9024-s002.pdf]

## Expanded View Figures

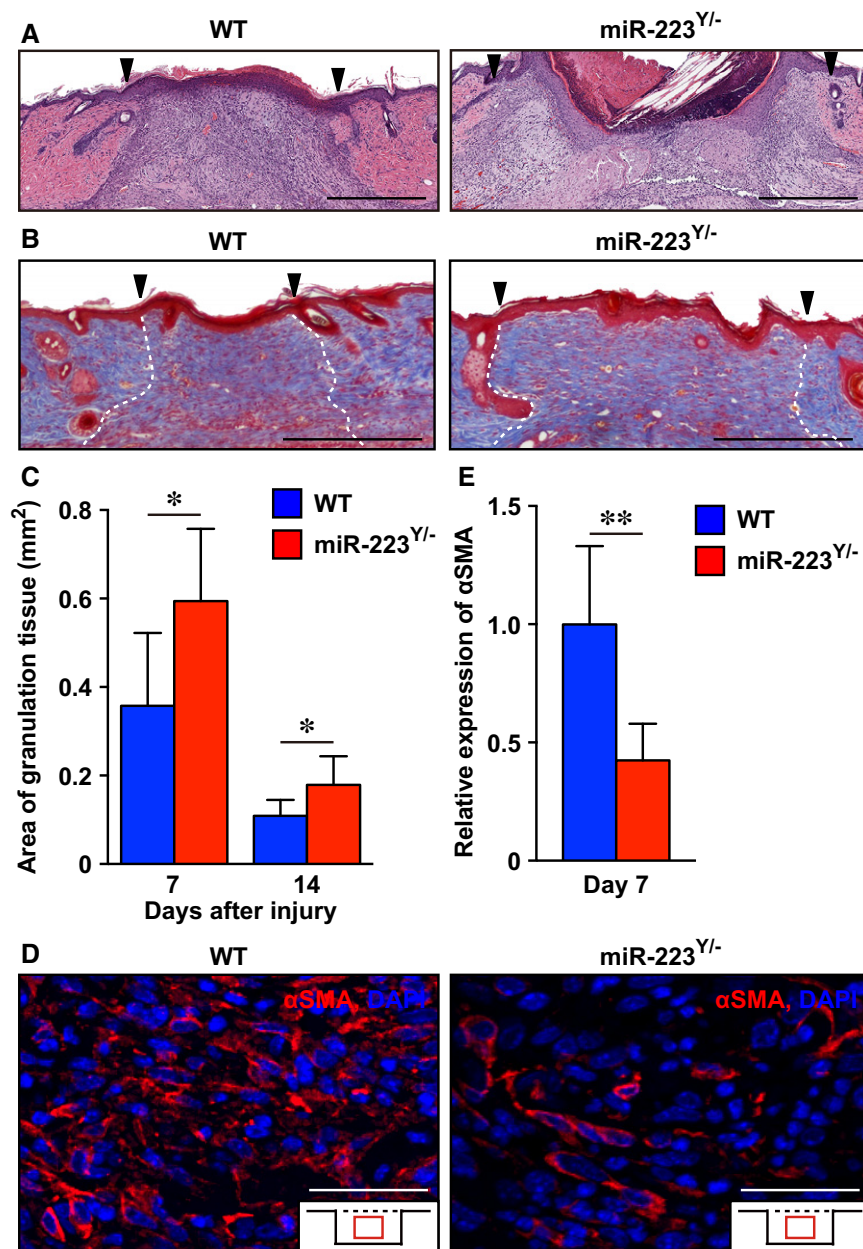

**Figure EV1. Attenuation of wound contraction and increased scar area in *miR-223<sup>Y/-</sup>* mice.**

- A** Representative images using H&E staining of wound sites at day 7 in WT ( $n = 8$ ) and *miR-223<sup>Y/-</sup>* ( $n = 6$ ) mice. Scale bars: 500  $\mu\text{m}$ .
- B** Representative images of Masson's Trichrome staining of collagen fibers (blue) in skin wound tissues of WT ( $n = 7$ ) and *miR-223<sup>Y/-</sup>* ( $n = 8$ ) mice at day 14 after injury. Scar sites were visualized at the mid-point of the wound (indicated by dotted line). Nuclei are stained black, and cytosol is stained red. Scar formation is clearly recognizable by day 14 after injury. Scale bars: 500  $\mu\text{m}$ .
- C** Measurement of granulation tissue area at wound sites from WT (day 7;  $n = 8$ , day 14;  $n = 7$ ) and *miR-223<sup>Y/-</sup>* (day 7;  $n = 6$ , day 14;  $n = 8$ ) mice.
- D** Representative images of  $\alpha\text{SMA}$ -positive wound-infiltrated myfibroblasts at day 7 in wound sites from WT and *miR-223<sup>Y/-</sup>* mice ( $n = 7$ ). Scale bars: 50  $\mu\text{m}$ .
- E** Quantification of expression of  $\alpha\text{SMA}$  at day 7 in wound sites from WT and *miR-223<sup>Y/-</sup>* mice ( $n = 7$ ).

Data information: All values represent the mean  $\pm$  SD. Unpaired  $t$ -tests were used to generate  $P$ -values indicated in the Figure. \* $P < 0.05$ , \*\* $P < 0.01$ .

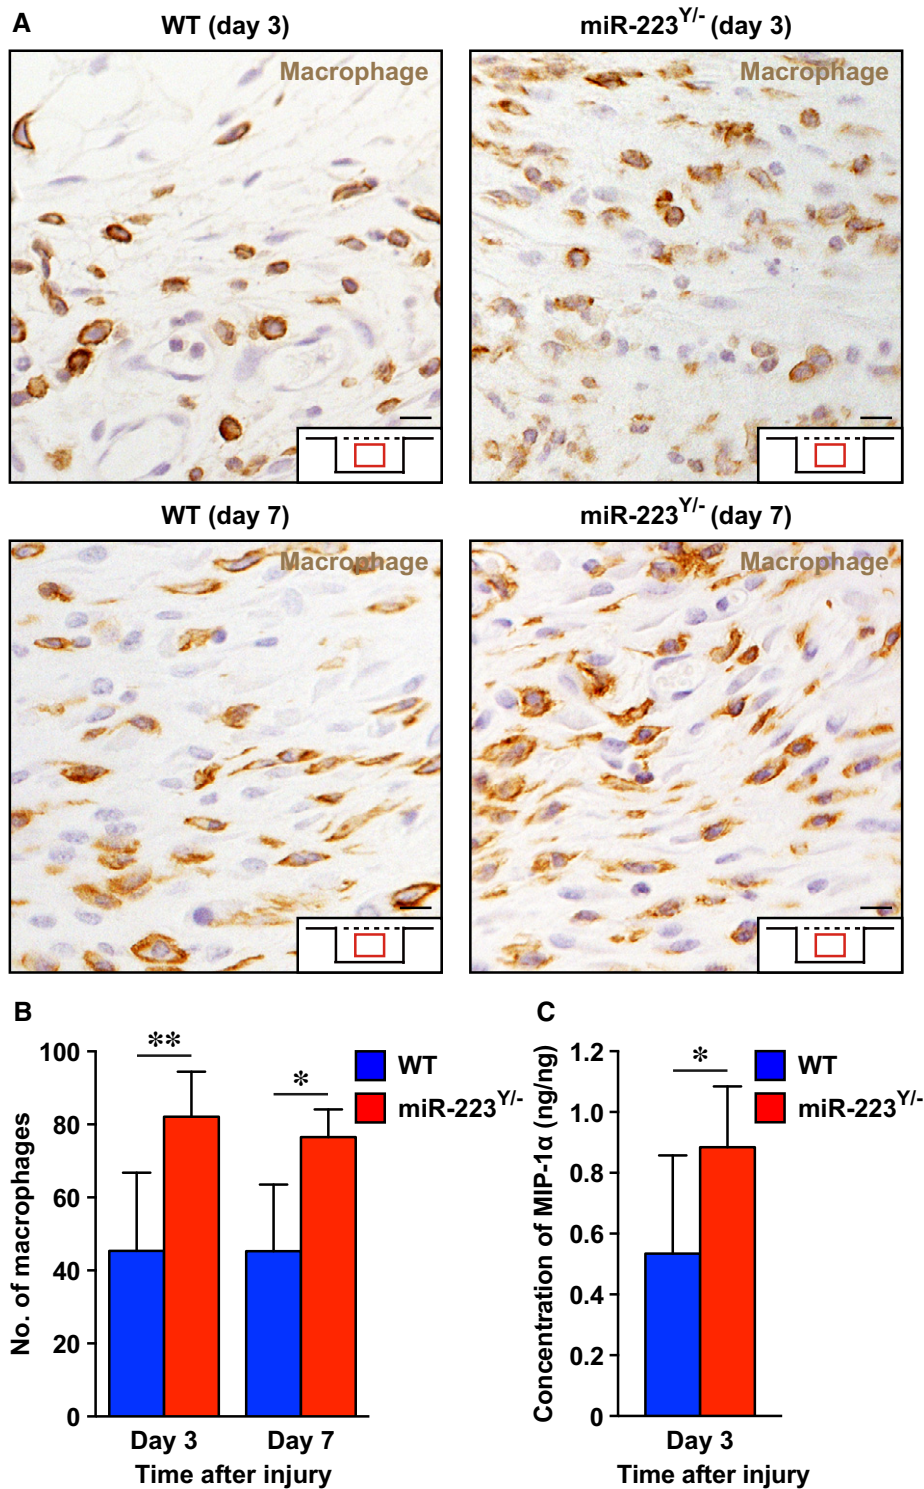

**Figure EV2. Macrophage infiltration of wound sites in *miR-223<sup>Y/-</sup>* and WT mice.**

A Representative images of F4/80-positive macrophages at wound sites from WT (day 3; *n* = 6, day 7; *n* = 5) and *miR-223<sup>Y/-</sup>* (day 3; *n* = 6, day 7; *n* = 4) mice. Scale bars: 50 μm.

B Quantification of F4/80-positive macrophages at wound sites from WT (day 3; *n* = 6, day 7; *n* = 5) and *miR-223<sup>Y/-</sup>* (day 3; *n* = 6, day 7; *n* = 4) mice.

C Measurements of MIP-1α at wound sites using ELISA (*n* = 6).

Data information: All values represent the mean ± SD. Unpaired *t*-tests were used to generate *P*-values indicated in the Figure. \**P* < 0.05, \*\**P* < 0.01.

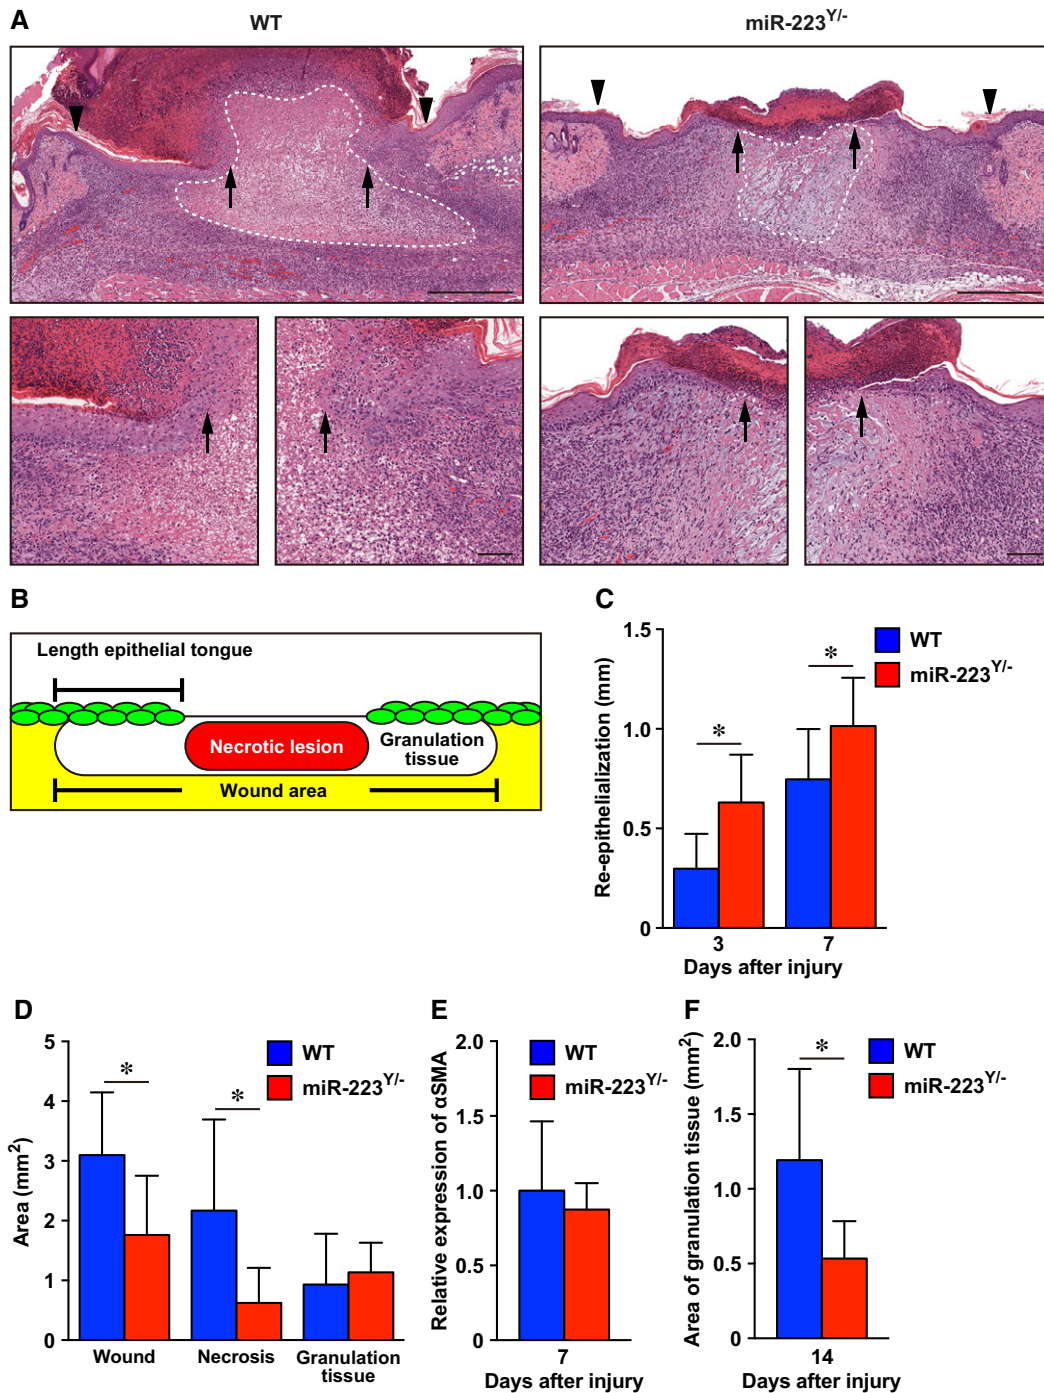

**Figure EV3.** *miR-223*<sup>Y/-</sup> mice show accelerated *Staphylococcus aureus*-infected skin wound healing.

**A** H&E staining of re-epithelialization at day 7 after injury (wound margin (arrowheads) and the leading edge of epithelia (arrows)). Dotted line indicates pathological necrotic lesion. Scale bars: 500  $\mu\text{m}$  (top) and 100  $\mu\text{m}$  (bottom).

**B** Schematic indicating the measurements derived from histological sections.

**C** Measurement of the epithelial tongue at day 3 and day 7 after injury in WT (day 3;  $n = 4$ , day 7;  $n = 8$ ) and *miR-223*<sup>Y/-</sup> (day 3;  $n = 5$ , day 7;  $n = 6$ ) mice.

**D** Measurement of the total wound area, necrotic lesion area, and granulation tissue area at day 7 after injury in WT neutrophil-transplanted and *miR-223*<sup>Y/-</sup> neutrophil-transplanted wounds ( $n = 6$ ).

**E** Quantification of the expression of  $\alpha\text{SMA}$  at day 7 in *S. aureus*-infected wound sites from WT ( $n = 6$ ) and *miR-223*<sup>Y/-</sup> mice ( $n = 7$ ).

**F** Measurements of the granulation tissue area at day 14 in WT ( $n = 7$ ) or *miR-223*<sup>Y/-</sup> wound sites ( $n = 5$ ).

Data information: All values represent the mean  $\pm$  SD. Unpaired *t*-tests were used to generate *P*-values indicated in the Figure. \**P* < 0.05.

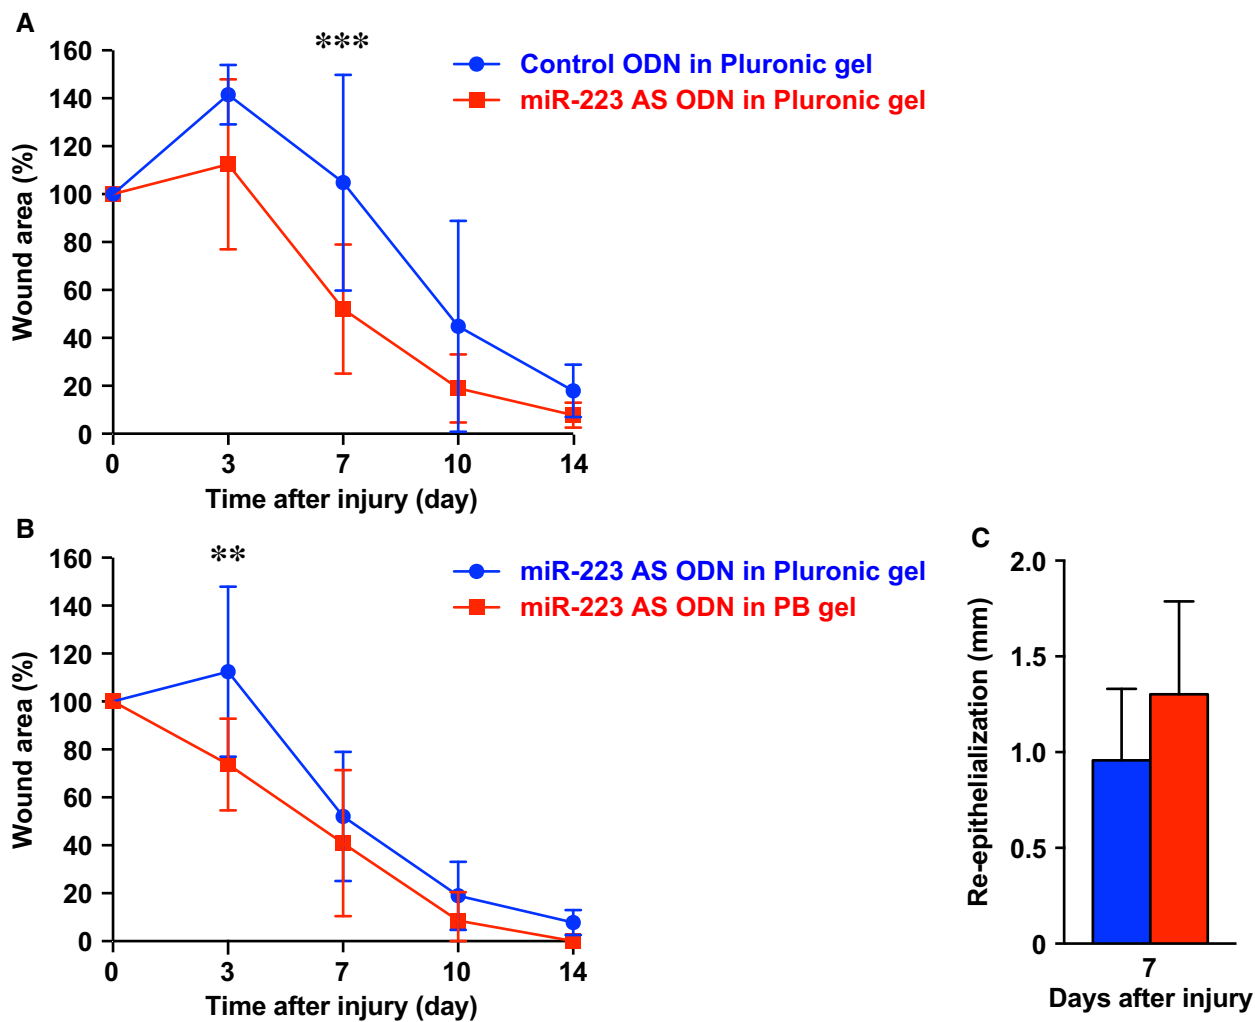

**Figure EV4.** miR-223 AS ODN in PB gel-treated *Staphylococcus aureus*-infected skin wound sites are improved compared with Pluronic gel.

- A The proportion of the wound remaining open relative to the initial *S. aureus*-infected wound area at each time point after the injury in control ODN in Pluronic gel versus miR-223 AS ODN in Pluronic gel-treated wounds ( $n = 8$ ).
- B The proportion of the wound remaining open relative to the initial *S. aureus*-infected wound area at each time point after injury in PB gel ( $n = 7$ ) versus Pluronic gel ( $n = 8$ ).
- C Measurement of the epithelial tongue at day 7 after injury in control ODN in PB gel and miR-223 AS ODN in PB gel-treated wounds ( $n = 6$ ).

Data information: All values represent the mean  $\pm$  SD. Two-way ANOVA followed by Sidak multiple comparison test was used to generate the  $P$ -values indicated in the Figure.  $**P < 0.01$ .  $***P < 0.001$ .

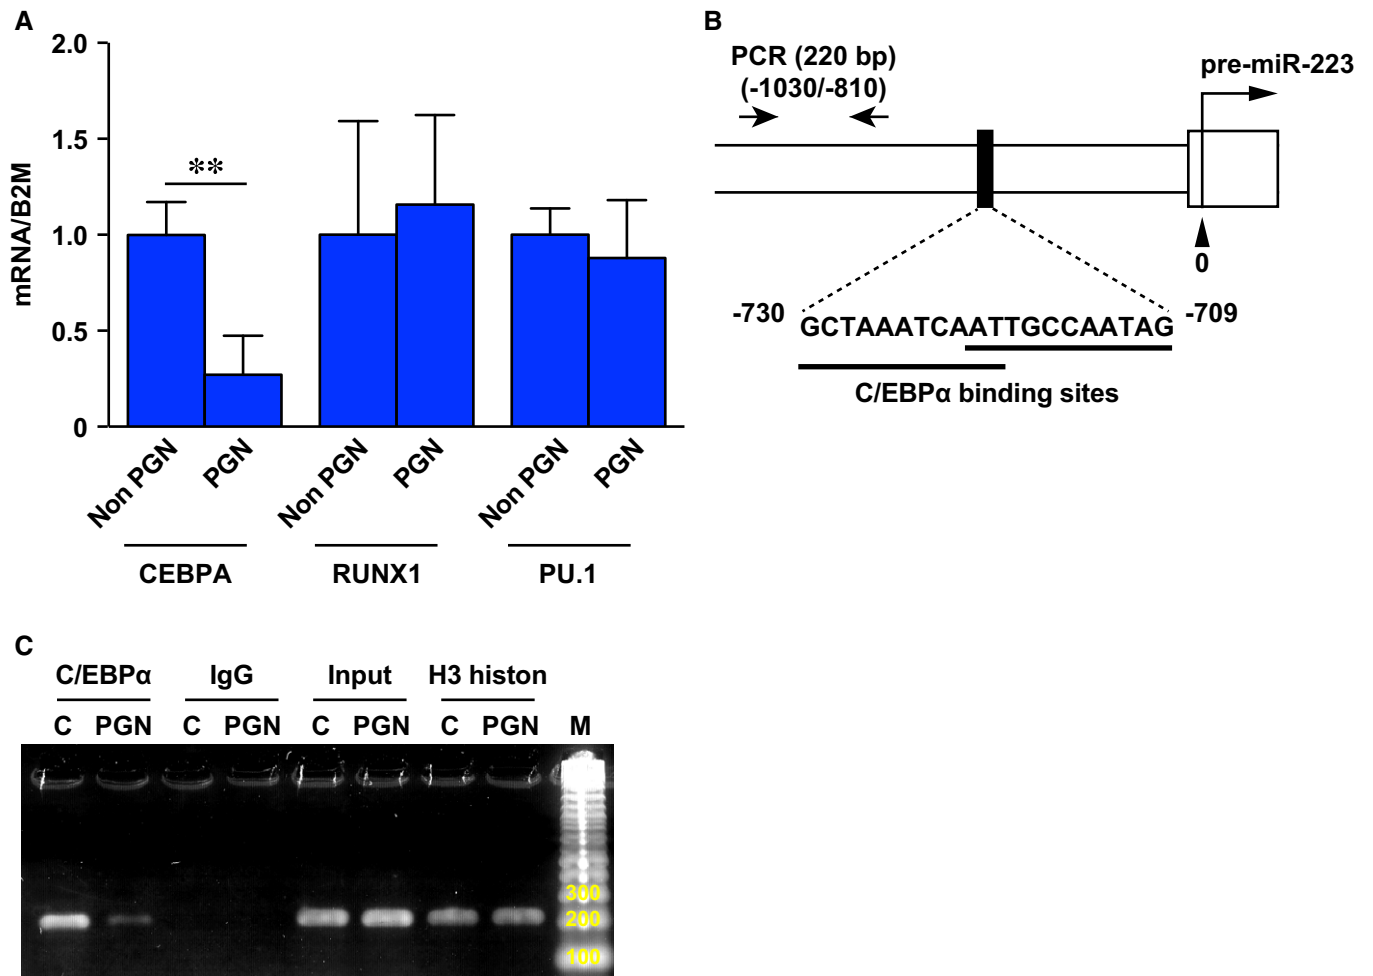

**Figure EV5. Expression of *CEBPA*, *RUNX1*, and *PU.1*.**

A Gene expression of *CEBPA*, *RUNX1*, and *PU.1* in dHL-60 after stimulation with PGN for 6 h measured by qPCR relative to beta-2-microglobulin (*B2m*) ( $n = 3$ ).

B Schematic representation of the genomic composition of the pre-*miR-223* locus and C/EBP $\alpha$  binding sites. ChIP-PCR was performed with PCR primers #1 and #2. The location of primers (–1,030/–810 with respect to the 5' end of the pre-*miR-223*) is shown in the lower panel together with sequence for the C/EBP $\alpha$  binding sites.

C Representative image of ChIP-PCR production amplified by primers (220 bp) on 2% agarose gel. Anti-C/EBP $\alpha$  Ab-ChIP amplification in non-stimulated dHL-60 cells was markedly increased compared with 6-h PGN-stimulated dHL-60 cells. Control amplification was carried out using anti-IgG isotype control Ab-ChIP (negative control), anti-H3 histone Ab-ChIP (procedure positive control), and input chromatin.

Data information: All values represent the mean  $\pm$  SD. Unpaired *t*-tests were used to generate *P*-values indicated in the Figure. \*\**P* < 0.01.
