# Supplementary material for: Targeting miR‐223 in neutrophils enhances the clearance of Staphylococcus aureus in infected wounds
Source: PubMed Central journal article supplement (PMC6180296; doi:10.15252/emmm.201809024), 2018-08-31
Supplement: EMMM-10-e9024-s007.pdf [file EMMM-10-e9024-s007.pdf]

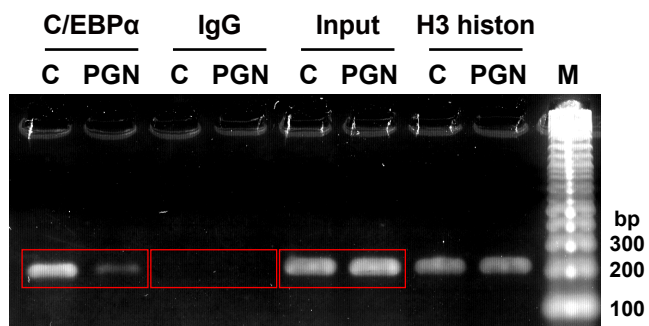

Source Data Figure 8F
